# Supplementary material for: Unravelling the importance of the eukaryotic and bacterial communities and their relationship with Legionella spp. ecology in cooling towers: a complex network
Source: PubMed Central journal article supplement (PMC7664032; doi:10.1186/s40168-020-00926-6), 2020-11-12
Supplement: 40168_2020_926_MOESM3_ESM.pdf [file 40168_2020_926_MOESM3_ESM.pdf]

**Table S3:** Characteristics of Cooling Tower Samples

| Tower name | Total Iron ( $\mu\text{L}$ ) | Dissolved Organic Carbon (DOC, mg/L) | Disinfection schedule | Administrative regions | Source of water                       |
|------------|------------------------------|--------------------------------------|-----------------------|------------------------|---------------------------------------|
| CdQ1       | 11                           | 12.5                                 | Weekly                | Centre du Québec       | Nicolet River                         |
| CN1        | 387                          | 12.6                                 | Daily                 | Capitale Nationale     | St-Lawrence river                     |
| CN2        | 427                          | 12.6                                 | Continuous            | Capitale Nationale     | St-Charles lake,<br>St-Lawrence river |
| CN3        | 805                          | 5.92                                 | Daily                 | Capitale Nationale     | St-Charles lake,<br>St-Lawrence river |
| CN4        | 603                          | 35.0                                 | Weekly                | Capitale Nationale     | St-Charles lake,<br>St-Lawrence river |
| Out1       | 970                          | 37.4                                 | Continuous            | Outaouais              | Ottawa river                          |
| Out2       | 715                          | 25.3                                 | Continuous            | Outaouais              | Ottawa river                          |
| MTL1       | 109                          | 13.8                                 | Continuous            | Montréal               | St-Lawrence river                     |
| MTL2       | 55                           | 15.8                                 | NA                    | Montréal               | St-Lawrence river                     |
| MTL3       | 209                          | 17.8                                 | Continuous            | Montréal               | St-Lawrence river                     |
| MTL4       | 72                           | 11.3                                 | Continuous            | Montréal               | St-Lawrence river                     |
| MTL5       | 82                           | 10.0                                 | Weekly                | Montréal               | St-Lawrence river                     |

|       |      |      |            |          |                   |
|-------|------|------|------------|----------|-------------------|
| MTL6  | 155  | 8.24 | Daily      | Montréal | St-Lawrence river |
| Est1  | 738  | 16.1 | Weekly     | Estrie   | St-François river |
| Est2  | 1384 | 40.8 | Weekly     | Estrie   | St-François river |
| Mont1 | 134  | 15.1 | Continuous | Montréal | St-Lawrence river |
| MTL7  | 182  | 14.2 | Weekly     | Montréal | St-Lawrence river |
| MTL8  | 14   | 15.1 | Weekly     | Montréal | St-Lawrence river |
