# Supplementary material for: Unravelling the importance of the eukaryotic and bacterial communities and their relationship with Legionella spp. ecology in cooling towers: a complex network
Source: PubMed Central journal article supplement (PMC7664032; doi:10.1186/s40168-020-00926-6), 2020-11-12

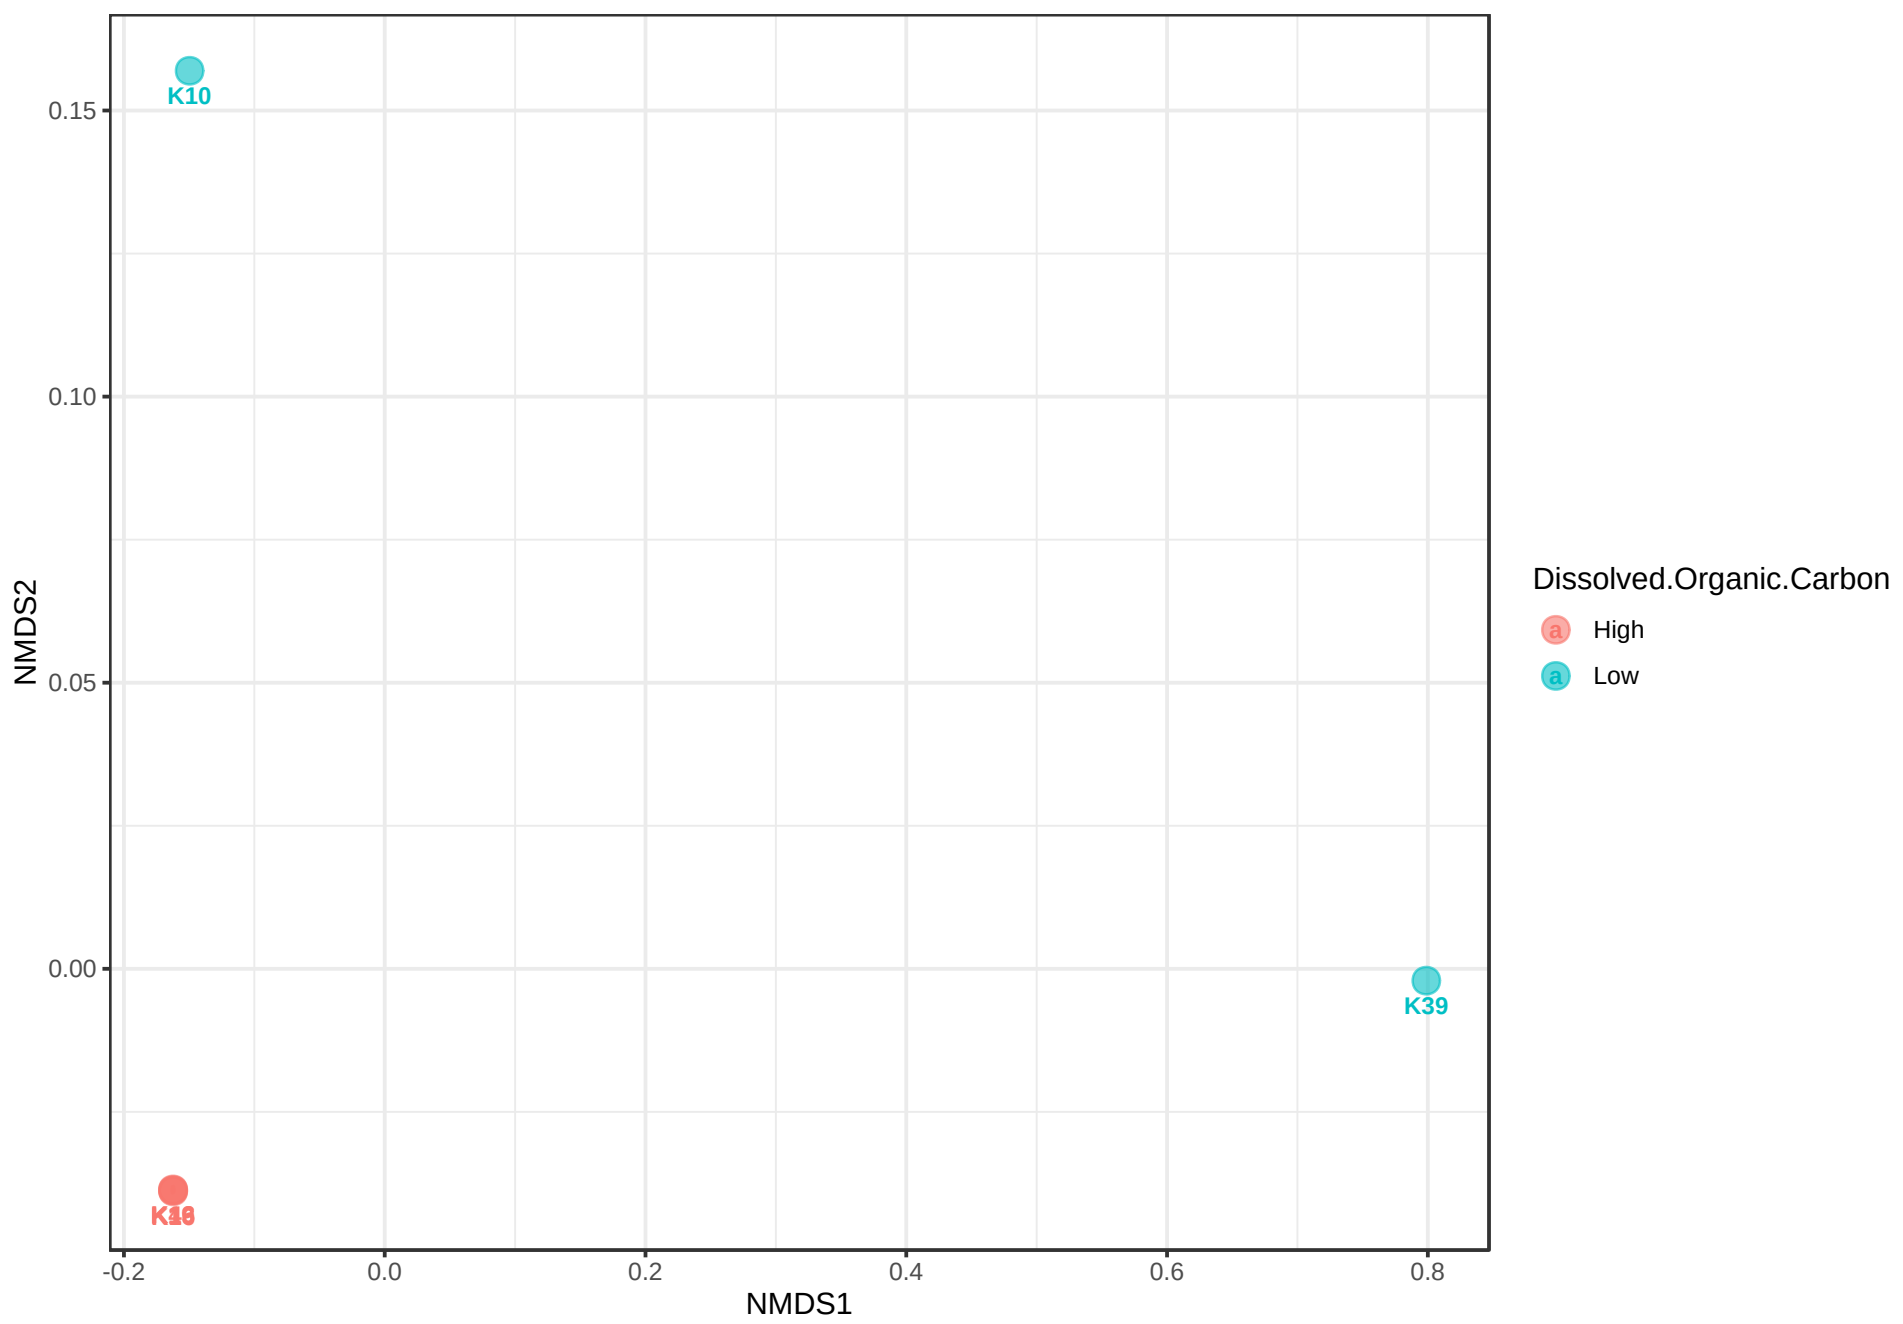

Supplement: 40168_2020_926_MOESM4_ESM.pdf [file 40168_2020_926_MOESM4_ESM.pdf]
